1 **A positive role of task-deactivated default mode network in narrative**  
2 **speech comprehension**

3 Lanfang Liu<sup>1,2</sup>, Hehui Li<sup>3</sup>, Zhiting Ren<sup>4</sup>, Qi Zhou<sup>2</sup>, Yuxuan Zhang<sup>2</sup>, Chunming Lu<sup>2</sup>,  
4 Jiang Qiu<sup>4</sup>, Hong Chen\*<sup>4</sup>, Guosheng Ding\*<sup>2</sup>

5 <sup>1</sup>Department of Psychology, Sun Yat-sen University, Guangzhou, 510006, P.R. China;

6 <sup>2</sup>Center for Brain Disorders and Cognitive Sciences, Shenzhen University, Shenzhen,  
7 518060, PR China

8 <sup>3</sup>State Key Laboratory of Cognitive Neuroscience and Learning, Beijing Normal  
9 University & IDG/McGovern Institute for Brain Research, Beijing, 100875, P.R. China;

10 <sup>4</sup>Key Laboratory of Cognition and Personality (SWU), Ministry of Education &  
11 Department of Psychology, Southwest University, Chongqing, 400715, P.R. China

12

13 **Corresponding author:** either Guosheng Ding, State Key Laboratory of Cognitive  
14 Neuroscience and Learning, Beijing Normal University, No. 19 Xijiekouwai Street,  
15 Beijing 100875, China, E-mail: dinggsh@bnu.edu.cn, or Hong Chen, School of  
16 psychology, SouthWest University, No. 2 Tiansheng Street, Beibei, Chongqing, 400715,  
17 E-mail: chenhg@swu.edu.cn

18 **Acknowledgments:** This work was supported by grants from the National Natural  
19 Science Foundation of China (NSFC: 3190082, 31971036), China Postdoctoral Science  
20 Foundation (2019M653248) and the Open Research Fund of the State Key Laboratory  
21 of Cognitive Neuroscience and Learning from Beijing Normal University

22 (CNLYB1803).

23

24 **Data availability statement:** The data and codes used in this study are available from  
25 the corresponding author upon reasonable request.

26 **Ethics approval statement:** Written informed consent was obtained from all  
27 participants under the protocol approved by the Reviewer Board of Southwest  
28 University.

29 **Conflict of interest disclosure:** No conflict of interest is declared.

30

31

32

33

34

35

36

37

38

39

40

41

42

43

44

45

46

47

48

49

50

51

52

53

54

55

56

57 **Abstract**

58 Psychological theories have implicated an active role of the default mode network  
59 (DMN) in natural speech comprehension. However, as listeners need to keep tracking  
60 the external audio streams, the DMN is regularly de-activated and anticorrelated with  
61 externally-oriented networks. Such a pattern has been interpreted as the suppression of  
62 the DMN to support externally-oriented cognitive processes. The current study aims to  
63 resolve this seeming contradiction. Brain activities from a speaker telling  
64 autobiographical stories and a group of participants (N = 62) listening to the recordings  
65 were collected with fMRI. By analyzing the listeners' brains alone, we found the DMN  
66 was deactivated during speech listening relative to a fixation period and anticorrelated  
67 with the task-positive perisylvian language network (pLN). Dynamic Causal Modeling  
68 showed the pLN had inhibitory influence on the DMN, whereas the DMN had  
69 excitatory influence on the pLN. Further between-brain analyses revealed the activities  
70 of DMN in the listener's brain were tightly coupled with the activities of the  
71 homologous network in the speaker's brain. Significant interbrain couplings were also  
72 observed in the pLN, but were weaker and faded quicker. Moreover, listeners showing  
73 stronger coupling responses to the speaker in the DMN understood the speech better,  
74 and tended to exhibit more positive DMN → pLN effective connections. We conclude  
75 that the DMN may occupy an internal system that works cooperatively with the  
76 externally-oriented pLN to support narrative speech comprehension.

77 **Keywords:** default mode network, speech comprehension, neural coupling, fMRI

78

79

## 80 **1. Introduction**

81 In neurolinguistic studies, verbal communication has been usually approached as a  
82 signal transmission process, and the main attention has been paid to the neural  
83 responses bound to and triggered by the occurrence of speech signals (Stolk et al.,  
84 2016b). Within this signal-centered framework, the crucial role of a set of frontal and  
85 temporal regions (i.e., the perisylvian language network, pLN) in coding and decoding  
86 the sensory-motor, syntactic and semantic properties of speech signals has been well  
87 recognized. Nevertheless, in real-life situations, the speech signals we receive are  
88 usually impoverished, degraded or ambiguous. Yet, we can still decipher the meaning  
89 intended by a speaker accurately. By contrast, current state-of-art artificial agents, such  
90 as Apple's Siri or Microsoft's Cortana, often make communicative errors despite they  
91 have mastered the signal decoding rules. These observations indicate that successful  
92 speech understanding demands more than signal decoding.

93 Indeed, psychological models have proposed that, in addition to the perceptual and  
94 linguistic analyses, to successfully understand the speaker's mind during verbal  
95 communication further requires the listener to integrate the signal's meaning with  
96 his/her internal conceptual space and align his/her mental state with the speaker's  
97 (Pickering & Garrod, 2006; Berwick et al., 2013; Wheatley et al., 2019). These  
98 internally-directed processes have been frequently linked to the default mode network  
99 (DMN) (Spreng et al., 2008; Spreng & Grady, 2009; Li et al., 2014), an intrinsically  
100 organized functional system composed of the posterior cingulate cortex, precuneus,

101 medial prefrontal cortex, and lateral parietal cortex (Marcus E. Raichle et al., 2001).

102       Despite the theoretical expectation, direct and convincing evidence for an active  
103 role of the DMN in auditory language comprehension is still lacking. Instead, as  
104 auditory language processing requires the participants to keep tracking external audio  
105 streams, the DMN has been repeatedly found to be deactivated relative to low-level  
106 baselines (Wilson et al., 2007; Szaflarski et al., 2012; Rodriguez Moreno et al., 2014;  
107 Horowitz-Kraus et al., 2017; Cuevas et al., 2019), and anticorrelated with networks  
108 dedicated to externally-oriented processes (including the pLN and attention network)  
109 (Fox et al., 2005; Uddin et al., 2009; Smith et al., 2012). The task-induced deactivation  
110 and network anticorrelation seem to imply that the DMN was “suppressed” to support  
111 externally-oriented cognitive activities (Anticevic et al., 2012; Gauffin et al., 2013;  
112 Zhou et al., 2016).

113       By measuring the correlation of blood-oxygen-level-dependent (BOLD) signal  
114 fluctuations across subjects (i.e., intersubject correlation, ISC) rather than the  
115 magnitude of task-induced activation, several studies found significant ISC in the DMN  
116 regions during narrative speech comprehension (Wilson et al., 2007; Lerner et al., 2011;  
117 Simony et al., 2016; Yeshurun et al., 2017), which was modulated by the coherence of  
118 the stimulus’ temporal structure over minutes of time (Lerner et al., 2011; Simony et  
119 al., 2016) and the manipulation of story belief (Yeshurun et al., 2017). These results are  
120 considered to reflect the involvement of DMN in semantic and conceptual processing.  
121 However, there is a possibility that the ISC (and its change) in the DMN might be an  
122 epiphenomenon of task engagement. It is well known that the activities of DMN regions

123 are systematically modulated by task difficulty (Zwaan & Radvansky, 1998;  
124 McKiernan et al., 2003; Greicius & Menon, 2004; Humphreys et al., 2015). If subjects  
125 find the same part of the narrative more or less engaging, the DMN will be down- or  
126 up-regulated similarly across subjects, which would result in the correlation of brain  
127 signal fluctuations across subjects (Wilson et al., 2007).

128       The discrepancy between the theoretical prediction and empirical findings  
129 regarding the role of DMN in auditory language comprehension may stem from two  
130 methodological issues. First, by focusing on task-evoked brain activation or  
131 deactivation, prior work has primarily captured the reflexive activity of the brain.  
132 However, it has been proposed that our brain activities are mainly intrinsic, involving  
133 “information processing for interpreting, responding to and predicting environmental  
134 demand” (M. E. Raichle, 2010). While analyzing task-evoked brain responses has been  
135 highly productive in delineating the functional role of pLN in linguistic processing, this  
136 approach may not accurately capture the functional property of DMN. Second, in prior  
137 work speech comprehension has been mainly analyzed as an independent process from  
138 speech production within the boundaries of individual brains. However, by recording  
139 the brain activities from both speakers and listeners during natural verbal  
140 communication (the “two-brain” approach), recent work has demonstrated that neural  
141 activities across the listener and speaker are tightly coupled (Stephens et al., 2010; Jiang  
142 et al., 2012; Silbert et al., 2014; L. Liu et al., 2020). The listener-speaker neural coupling  
143 is postulated to reflect the alignment between interlocutors at multiple levels of  
144 linguistic and extra-linguistic representations (Hasson & Frith, 2016; Schoot et al., 2016)

145 which forms the basis of mutual understanding (Pickering & Garrod, 2006; Hasson et  
146 al., 2012; Stolk et al., 2016a). Thus, analyzing single individuals in isolation may fail  
147 to achieve a complete picture of the functional role of DMN in speech understanding.

148 To better illuminate the role of DMN in speech comprehension, we scanned  
149 participants engaged in natural verbal communication and analyzed both response  
150 profiles within the listeners' brains and neural couplings between the listeners and the  
151 speaker. A group Independent Component Analysis (ICA) combined with a "dual-  
152 regression" technique was applied to detect the DMN and pLN in individual brains.  
153 Replicating previous findings, we found task-induced negative activation in the DMN  
154 whereas positive activation in the pLN, and anticorrelation between the dynamics of  
155 the two networks. However, further two-brain analyses revealed significant listener-  
156 speaker neural couplings in both the DMN and pLN, with longer response lag in the  
157 DMN than in the pLN. When communication failed or when the content of story was  
158 not matched between the speaker and listener, the between-brain coupling in both the  
159 DMN and pLN vanished. Moreover, the level of coupling strength in both the DMN  
160 and pLN could predict the degree to which the listeners understood and memorize the  
161 speech. These results provide reliable evidence showing that the DMN plays an active  
162 in language comprehension, which may contribute in a different way and support  
163 distinct computations from that of the pLN.

## 164 **2. Materials and Methods**

165 A schema depicting the experimental procedure and data analyses in this study is shown

166 in Figure 1.

## 167 **2.1 Participants and experimental procedure**

168 A total of 67 Chinese college students (aged 19-27 years) participated in this study,  
169 including one female speaker and 66 listeners (35 females). We also recruited a native  
170 Mongolian speaker (a female college student) to serve for a control condition. All  
171 participants were right-handed, and reported no history of physiological or mental  
172 disorder. None of these listeners had learned Mongolian. Written informed consent was  
173 obtained from all participants under a protocol approved by the Reviewer Board of  
174 Southwest University in China.

175 The experimental protocol was identical to that used in our previously published  
176 study (L. Liu et al., 2020). We therefore only briefly described it here. In the first step,  
177 we had the speakers told stories based on their personal experience (10 min for each)  
178 while undergoing fMRI scanning. A noise-canceling microphone (FOMRI-III,  
179 Optoacoustics Ltd., Or-Yehuda, Israel) was used to simultaneously record the speech.  
180 After further off-line denoising by Adobe Audition 3.0 (Adobe Systems Inc., USA), the  
181 audio recordings were played back to each of the 66 listeners during scanning. A  
182 common set of visual stimuli were presented to the speakers and listeners, consisting  
183 of a fixation cross lasting for 20s and then an icon of a horn lasting until the end of the  
184 scanning run. The horn was designed to prompt the participant to start speaking or  
185 listening immediately.

186 Each participant listened to one of the three stories told by the Chinese speaker. To



187 make the listeners attend to the stories, we informed them beforehand that a test about  
188 the content of the story would be given after the scanning. To control for the effect of  
189 low-level acoustic processing, we also played the story told by the Mongolian speaker  
190 to each listener. Before the speech listening/speaking task, all participants underwent a  
191 10-min resting-state scan during which their eyes were closed.

### 192 **2.3 Behavioral assessment**

193 To assess the degree to which the listeners understood the speech, we conducted an  
194 interview with each listener at the end of the scan. In the interview, the listeners were  
195 required first to retell the story with as much detail as possible. Next, experimenters  
196 asked the listeners several questions concerning the part of the contents not present in  
197 their free recalls. Two independent raters then scored the listeners based on the audio  
198 recordings of the interview. To make the scoring as objective as possible, we made a  
199 list of questions regarding important contents of the story (such as “what happened on  
200 her way to the hotel”). The correct answers included several critical points covering  
201 characters, places, time, and motivations et al. A score was given for each question on  
202 the list according to the information a listener provided about those key points. The  
203 scores for all questions were then summed up and divided by the full score. There was  
204 a high agreement between the assessments made by the two raters ( $r_{(64)} = 0.80$ , by  
205 Pearson’s correlation). The average score given by the two raters was used as the  
206 measurement for speech comprehension. To account for a potential effect of memory  
207 capacity on the story-retelling task, we measured participants’ memory span using a

208 digit memory test (Wechsler, 1987). The number of digits correctly repeated forward  
209 and backward were used as two covariates for the following brain-behavior analysis.

## 210 **2.4 MRI acquisition and preprocessing**

211 Imaging data were collected with a 3T Siemens Trio scanner in the MRI Center of the  
212 Southwest University of China. Functional images were acquired using a gradient echo-  
213 planar imaging sequence with the following parameters: repetition time = 2000 ms,  
214 echo time = 30 ms, flip angle = 90°, field of view = 220 mm<sup>2</sup>, matrix size = 64 × 64, 32  
215 interleaved slice, voxel size = 3.44 × 3.44 × 3.99 mm<sup>3</sup>. T1 structural images were  
216 acquired using a MPRAGE sequence with the following parameters: repetition time =  
217 2530 ms, echo time = 3.39 ms, flip angle = 7°, FOV = 256 mm<sup>2</sup>, scan order = interleaved,  
218 matrix size = 256 × 256, and voxel size = 1.0 × 1.0 × 1.33 mm<sup>3</sup>.

219 After discarding the first three volumes to allow for the equilibration of magnetic  
220 fields, a total of 310 volumes were acquired in each run. The DPABI toolkit (Yan, Wang,  
221 Zuo, & Zang, 2016) based on SPM12 ([www.fil.ion.ucl.ac.uk/spm/](http://www.fil.ion.ucl.ac.uk/spm/)) was utilized for  
222 image preprocessing. The preprocessing steps included slice-timing correction, spatial  
223 realignment, co-registration to individual subject's anatomical images, normalization  
224 to the Montreal Neurological Institute (MNI) space, resampling into a 3 × 3 × 3 mm<sup>3</sup>  
225 voxel size, and smoothing (FWHM = 7mm). The resultant images were further  
226 detrended, nuisance variable regressed, and high-pass filtered (1/128 Hz). The nuisance  
227 regression included the removal of five principal components of white matter and  
228 cerebrospinal fluid within individual subjects' T1 segmentation mask (Behzadi et al.,

229 2007), as well as Friston's 24 motion parameters (including each of the six motion  
230 parameters of the current and preceding volume, plus each of these values squared)  
231 (Friston et al., 1996). The datasets of four participants listening to the Chinese story,  
232 four participants listening to the Mongolian story, and two participants during the  
233 resting state were discarded due to excessive head movement (more than 3mm or 3  
234 degrees).

## 235 **2.5 Data analysis**

### 236 **2.5.1 Group Independent Component Analysis and component selection**

237 To detect the DMN and pLN, a group spatial ICA was conducted using Group ICA of  
238 fMRI Toolbox (GIFT). The first 10 volumes corresponding to the 20s fixation were not  
239 included in this analysis. The dimensionality of data from each participant was first  
240 reduced to 30 dimensions using principal component analysis. Next, the dimension-  
241 reduced data (including both the speaker and all listeners) were temporally  
242 concatenated and a group dimension reduction was performed. Twenty independent  
243 sources were generated with the ICA using the infomax algorithm. Finally, spatial maps  
244 and associated time series for individual participants were reconstructed using  
245 aggregate components and original data via spatial-temporal regression (Beckmann et  
246 al., 2009). This dual-regression approach Since the spatial maps and time series of  
247 components have arbitrary units after the back-reconstruction step, they were scaled  
248 using Z-scores. These component time series were used in the further within- and  
249 between-brain connectivity analyses. A one-sample *t*-test was conducted on the scaled

250 maps to obtain the spatial distribution of each component.

251 The DMN and pLN were identified based on the spatial overlap of the component  
252 map with the meta-analytic maps for the DMN (using a search term “default mode  
253 network”) and the pLN (using a search term “language”) generated by the Neurosynth  
254 (<https://neurosynth.org>). For each component, its spatial map (i.e., the above  $t$ -statistic  
255 map) was thresholded using a set of  $t$ -values (ranges from 2.5 to 5.5, with an increment  
256 of 0.5) and then binarized. The degree of the spatial overlap between each binary  
257 component map and the thresholded binary meta-analytic map was then quantified by  
258 the widely-used Dice index (Dice, 1945), and the component showing the highest Dice  
259 score was selected. Upon identifying the components corresponding to the DMN and  
260 pLN, we thresholded the  $t$ -statistic maps with a  $p < 0.05$  (corrected for multiple  
261 comparisons with family-wise error (FWE) correction) for visualization and making  
262 masks used in the following analysis.

### 263 **2.5.2 BOLD signal change**

264 To assess how the DMN and pLN responded to external stimulation, we calculated  
265 percent changes in BOLD signal amplitudes during speech listening (the task) relative  
266 to the 20s fixation period (the baseline). The BOLD signal changes were defined as  
267  $[(task-baseline) / baseline]$ , where  $task$  and  $baseline$  corresponded to the mean signal  
268 amplitudes of time points within the task phase and the baseline phase, respectively. We  
269 first extracted the BOLD signal change in every voxel across the whole brain and  
270 applied a voxel-wise  $t$ -test to assess whether the signal change differed from zero at the  
271 group level. Next, two masks were created using the thresholded  $t$ -maps for the DMN

272 and pLN components obtained above, and a histogram of  $t$ -values from all voxels lying  
273 within each mask was generated. The histogram is used to reflect the overall distribution  
274 of BOLD signal change within the two networks. In addition to the descriptive analysis,  
275 we averaged the percent signal changes over all voxels within the mask, and performed  
276 a one-tailed  $t$ -test to determine whether the network activity was significantly increased  
277 (in the pLN) or decreased (in the DMN).

### 278 **2.5.3 Functional and effective connectivity analyses**

279 To understand how the DMN may contribute to speech comprehension, we examined  
280 how this network interacted with the well-understood pLN. To compare this study with  
281 most studies in the literature, we first examined the (undirected) functional connectivity  
282 between the DMN and pLN. For each participant, a Pearson's correlation coefficient  
283 between the time series of DMN and pLN was computed. Then a  $t$ -test was applied to  
284 assess whether the correlation coefficients differed significantly from zero at the group  
285 level.

286 Functional connectivities only capture the statistical dependencies between two  
287 signals (Friston, 2011). To better understand the observed dependencies, we further  
288 estimated effective connections (causal interactions) between the DMN and pLN using  
289 Dynamic Causal Modeling (DCM) toolbox in SPM12 (Friston, 2011). Three bilinear  
290 models without an input entering the system were constructed for each participant.  
291 Model 1 specified a connection from the pLN to DMN. Model 2 specified a connection  
292 from DMN to pLN. Model 3 specified bidirectional connections. All models included  
293 recurrent connections of each network. Since the speech signals presented during the

294 task were continuous stimuli, we fitted models based on the frequency-domain cross-  
295 spectral density of the time series, which is a technique originally developed for the  
296 modeling of resting-state fMRI data (Friston et al., 2014). Bayesian Model Selection  
297 (BMS) was used to identify the best-fitting model at the group level. Upon identifying  
298 the optimal model, Bayesian Parameter Averaging (BPA) was applied to estimate  
299 group-mean effective connectivity (EC) and to make statistical inference using  
300 Bayesian Parameter Averaging (Neumann & Lohmann, 2003; Kasess et al., 2010;  
301 Murta et al., 2012; Friston et al., 2014). In this method, individual subjects' parameters  
302 were weighted by their precision to compute the mean across subjects.

#### 303 **2.5.4 Measurement for listener-speaker neural coupling**

304 The above analyses had focused on neural activities within the listeners' brains. We  
305 next examined whether the activities of DMN and pLN were coupled across the listener  
306 and speaker. Pearson's correlation coefficients between the ICA-derived network time  
307 series from each listener's brain and the time series of the homologous network from  
308 the speaker's brain were calculated separately for the DMN and pLN. Previous work  
309 has demonstrated that listeners need time to process the high-level information in  
310 speech in order to get aligned with the speaker (Stephens et al., 2010; Kuhlen et al.,  
311 2012; Y. Liu et al., 2017; L. Liu et al., 2020). To account for this effect, we repeated the  
312 inter-brain correlation analysis by shifting the time series of listener's network activity  
313 relative to that of the speaker's by 0-14s with 2s increments. At shift zero, the listener's  
314 network activity was time-locked to the speaker's vocalization. To assess the validity  
315 of using ICA-derived component time series to measure listener-speaker neural

316 coupling, we also performed the inter-brain correlation analysis using voxel-wise time  
317 series (see supplementary material).

318 Two-tailed *t*-tests were used to assess whether the neural couplings differed  
319 significantly from zero at the group level. We also examined whether the listener-  
320 speaker neural coupling would differ between the pLN and DMN by using a paired *t*-  
321 test. Multiple comparisons were corrected with an FDR  $q = 0.05$  using the Benjamini-  
322 Hochberg procedure (Benjamini & Hochberg, 1995).

### 323 **2.5.5 Control analyses**

324 To the best of our knowledge, this is the first study using network time series derived  
325 from group ICA to assess interbrain neural coupling. It is unclear whether the interbrain  
326 network couplings arose merely because the data from both the speaker and listeners  
327 were pooled together during the ICA procedure. To test this possibility, we conducted  
328 the group ICA for the same participants during resting states and assessed network  
329 correlations between the speaker and each listener. In addition, we tested whether the  
330 interbrain couplings arose simply because the speaker and listener received the same  
331 speech signals. For this purpose, listener-speaker network correlations were analyzed  
332 for the same participants listening to the Mongolian speaker telling a real-life story.  
333 Finally, the listener-speaker neural coupling is assumed to reflect inter-brain alignment  
334 at multiple levels of linguistic and conceptual representations (Menenti et al., 2012;  
335 Schoot et al., 2016). However, interbrain coupling could also arise from a general effect  
336 of arousal, focused attention, or memory shared by the listeners and the speaker. In

337 order to distinguish between the two possibilities, we examined the specificity of  
338 listener-speaker neural coupling to story contents using a Support Vector Machine  
339 (SVM) technique. Details for these analyses are provided in the supplementary material.

#### 340 **2.5.6 Brain-behavioral correlation**

341 To determine the functional role of listener-speaker neural coupling in the DMN and  
342 pLN, we examined the correlation between coupling strength and listeners'  
343 comprehension scores. A Pearson's partial correlation analysis was applied, which  
344 controlled for the potential effect of memory span. To assess the generalizability of the  
345 brain-behavior relationship we may find, we further performed a within-data set cross-  
346 validation (Shen et al., 2017). Specifically, a linear regression model was built on the  
347 data from all participants but one, taking listener-speaker neural couplings in both the  
348 DMN and pLN as two predictors and listener's comprehension score as the outcome.  
349 Then the model was used to predict the comprehension score of the left-out participant  
350 based on his or her neural coupling with the speaker in the DMN and pLN. With this  
351 leave-one-out procedure, we obtained a predicted score for every participant. To  
352 quantitatively assess the predictive power of the model, a Pearson's correlation between  
353 the predicted scores and actual scores was calculated as a test statistic. Since the null  
354 distribution associated with this test statistic is unknown, we performed a permutation  
355 test ( $N = 1000$ ) to determine whether the prediction (i.e., the correlation value) was  
356 significantly better than expected by chance. In each permutation, we randomized the  
357 comprehension scores across the training sample and re-conducted the prediction. A  $p$ -  
358 value was calculated as the percentage of permutations that showed a lower  $r$ -value than



359 the actual r-value.

### 360 **2.5.7 Analyses for potential associations of within-brain response profile with** 361 **between-brain neural coupling**

362 Finally, we explored whether the listener-speaker neural coupling was affected by (or  
363 had an effect on) the task-induced (de)activation and network interactions within  
364 listeners' brains. For this purpose, we examined the correlation between the strength of  
365 interbrain coupling (for the peaking time) and the averaged BOLD signal change within  
366 the network. In addition, we examined the correlation between the strength of interbrain  
367 neural coupling and the effective connectivity between the DMN and pLN. As  
368 exploratory analyses, results were not corrected for multiple comparisons.

## 369 **3. Results**

### 370 **3.1 Behavioral results**

371 For the story-recall task administered shortly after the scanning, participants scored on  
372 average  $91.58 \pm 8.00\%$ . There was no significant correlation between the  
373 comprehension score and the digit-memory span ( $p > 0.28$ ). For the Mongolian story  
374 (the control condition), the interview showed that the participants had tried to  
375 comprehend the speech but all failed.

## 376 **3.2 ICA-based detection of the default mode network and the perisylvian language** 377 **network**

378 By measuring the spatial overlap of each ICA component with the meta-analytic maps  
379 derived from the Neurosynth, we identified two components corresponding to the DMN  
380 and pLN, which consistently showed the highest Dice score across a set of thresholds  
381 among the 20 components resulted from the group ICA analysis. The DMN component  
382 covered mainly the bilateral precuneus, inferior parietal lobe, and part of the medial  
383 frontal gyrus (Fig. 2a). The pLN component covered mainly the bilateral superior and  
384 middle temporal, precentral, and inferior frontal gyrus, as well as the supplementary  
385 motor area. Homologues of the two networks were found for participants listening to  
386 the unintelligible Mongolian speech and at the resting state (Fig. S1).

## 387 **3.3 Opposite activation patterns between the DMN and pLN**

388 To assess task-induced (de)activations in the pLN and DMN, we measured percent  
389 signal changes during speech listening relative to the fixation period preceding the task.  
390 In agreement with previous findings, a large portion of voxels (67.8%) within the DMN  
391 exhibited decreased activity, with the most significant effect found in the precuneus  
392 (Fig. 2b). In comparison, most voxels (78.8%) within the pLN exhibited increased  
393 activity, with the most significant effect shown in the bilateral temporal cortex. In line  
394 with the distribution pattern, the  $t$ -test on the BOLD signal change averaged across  
395 voxels within the network showed a marginally significant effect of deactivation in the  
396 DMN ( $t_{(61)} = -1.56$ , one-tailed  $p = 0.06$ ), and a quite significant effect of activation in

397 the pLN ( $t_{(61)} = 7.09$ , one-tailed  $p < 10^{-9}$ ) (Fig. 2b). These effects were more prominent  
398 when the part of voxels overlapped between the two networks were not included in the  
399 analysis (for DMN:  $t_{(61)} = -2.01$ ,  $p = 0.024$ ; for pLN:  $t_{(61)} = 7.40$ ,  $p < 10^{-9}$ ).

400 We note the baseline used to calculate the BOLD signal change might be too short.  
401 To assess this effect, we compared this method with a conventional General Linear  
402 Modeling (GLM) method which included longer baselines using an independent dataset.  
403 The results showed that the activation and deactivation patterns obtained by the two  
404 approaches were similar, with the one obtained from the GLM being statistically more  
405 significant (Fig. S2). Thus, a relatively short baseline does not compromise the findings  
406 of opposite activation patterns between the DMN and pLN.

### 407 **3.4 Functional and effective connectivity between the DMN and pLN**

408 In line with previous findings (Uddin et al., 2009; Smith et al., 2012), the functional  
409 connectivity analysis showed that the dynamics of DMN and pLN were significantly  
410 anticorrelated over time (mean  $r = -0.13$ ,  $t_{(61)} = -6.90$ ,  $p < 10^{-8}$ ) (Fig. 3a). We further  
411 examined the effective connectivity (causal interactions) between the two networks  
412 using DCM. The Bayesian Model Selection procedure reported the model with  
413 bidirectional connectivity to be the best-fitting, with model exceedance probabilities  
414 greater than 99.9%. The Bayesian Parameter Averaging produced a negative value of  
415 group-mean connection from the pLN to the DMN (EC = -0.10, Bayesian probability  
416 = 1.0), indicating that the activity of pLN had an inhibitory effect on the activity of  
417 DMN. The value of group-mean connection from the DMN to the pLN was positive

418 (EC = 0.07, Bayesian probability = 1.0), indicating the excitatory influence of the  
419 DMN's activity over the activity of pLN (Fig. 3b). By comparison, the connection  
420 between the pLN and DMN in both directions were negative when comprehension  
421 failed (pLN → DMN: -0.020; DMN → pLN: -0.0002) or when participants were at  
422 resting states (pLN → DMN: -0.005; DMN → pLN: -0.011).

### 423 **3.5 Listener-speaker neural coupling in the DMN and pLN**

424 The task-negative activity and the anticorrelation with the pLN derived from the above  
425 within-brain analyses seem to indicate a negative role of the DMN in speech  
426 comprehension. However, the between-brain analyses revealed that the network  
427 dynamics of DMN in the listener's brain were significantly coupled (temporally  
428 correlated) with the dynamics of the homologous network in the speaker's brain (Fig.  
429 3A). We also found significant listener-speaker neural coupling in the pLN. The  
430 temporal profile differed between the two networks: in the pLN, the listener's network  
431 activity lagged the speaker's network activity by 0-8s and peaked at a lag of 4s; in the  
432 DMN, the listener's activity lagged by 2-12s and peaked at a lag of 6s. Overall, the  
433 listener-speaker neural coupling in the DMN was stronger than that in the pLN. An  
434 exception is at lag 0s, wherein listener-speaker neural coupling in the pLN was  
435 significantly stronger than that in the DMN. A similar pattern was obtained from the  
436 analysis based on inter-brain voxel-to-voxel correlation (Fig. 4a and Fig.S3).

437 A SVM classifier which took the interbrain couplings in the DMN and pLN as two  
438 features was built to identify which story (out of three) told by the Chinese speaker was

439 played to each listener. The SVM classifier achieved an average accuracy of 89.25%  
440 (sensitivity: 77.42%, specificity: 95.16%), which was higher than the best performance  
441 (70.97%) of the 1000 permutations. The area under the receiver-operating characteristic  
442 (ROC) curve was 0.90, demonstrating that the model discriminated well between the  
443 content-matched and -unmatched pairs (Fig. 4b). These results suggest that the  
444 interbrain couplings likely arose from semantic and conceptual representations shared  
445 by the speaker and listeners, rather than from joint attention, arousal or working  
446 memory processes.

447 When communication failed or when participants were at the resting state, no  
448 significant neural coupling between the listener and speaker was found in either the  
449 DMN or pLN (Fig. 4c). This result suggests that the coupling of network dynamics was  
450 not driven by a potentially shared acoustic representation between the listener and  
451 speaker. It also mitigates a methodological concern that the network time series  
452 correlated between the listeners and the speaker was because that the data from both  
453 sides had been pooled together to identify the network component during the group ICA  
454 analysis.

### 455 **3.6 Listener-speaker neural coupling predicts speech comprehension**

456 To determine the behavioral significance of listener-speaker neural coupling, we  
457 examined its correlation with the listener's level of speech understanding. A significant  
458 positive correlation was found between the comprehension score and the strength of the  
459 listener's neural coupling with the speaker in the DMN (partial  $r_{(60)} = 0.32$ ,  $p = 0.012$ ,

460 with memory span regressed out). There was also a positive correlation between  
461 coupling strength in the pLN and comprehension scores (partial  $r_{(60)} = 0.31$ ,  $p = 0.015$ ,  
462 with memory span regressed out) (Fig. 5).

463 A leave-one-out cross-validation procedure was performed to evaluate the  
464 generalizability of the brain-behavioral relation. In each fold of cross-validation, a  
465 regression model was built which took the listener-speaker neural coupling in both the  
466 DMN and pLN as inputs and generated predictions of comprehension scores in a novel  
467 participant. The predicted scores were positively correlated with actual scores, with  
468 predictive power significantly better than the results from 1000 iterations of  
469 permutations testing ( $r_{(60)} = 0.29$ ,  $p = 0.009$ ) (Fig. 5). The predictive power was better  
470 than using the data of DMN or pLN alone (DMN:  $r = 0.18$ ; pLN:  $r = 0.23$ ). These  
471 findings suggest both the DMN and pLN contribute to speech comprehension.

### 472 **3.7 Covarying of within-brain connectivity and between-brain neural coupling**

473 The analyses exploring the potential association of within-brain BOLD signal changes  
474 with between-brain couplings showed no significant results for either the DMN or pLN  
475 (both  $p > 0.1$ ), suggesting interbrain neural alignments were (partly) independent from  
476 within-brain neural responses to external stimulation. Interestingly, we found that the  
477 DMN  $\rightarrow$  pLN effective connection within the listeners' brains tended to correlate  
478 positively with the listener-speaker neural couplings in the DMN ( $r_{(60)} = 0.245$ ,  $p =$   
479  $0.055$ , by Pearson's correlation). In addition, the increase of the DMN  $\rightarrow$  pLN  
480 connection during successful speech comprehension relative to the failed condition also

481 positively correlated with the increase in listener-speaker neural coupling in the DMN  
482 ( $r_{(57)} = 0.26, p = 0.047$ ) (Fig. 6). These results may reflect the top-down modulation of  
483 higher-level conceptual processing implemented by the DMN on lower-level signal-  
484 decoding processes implemented by the pLN. No significant correlation was found  
485 between the pLN  $\rightarrow$  DMN connection and listener-speaker neural coupling in the pLN  
486 (both  $p > 0.1$ ).

#### 487 4. Discussion

488 In this study, we investigated the functional properties of DMN during natural verbal  
489 communication and examined both within-brain response profiles and between-brain  
490 interactions. Replicating previous findings (Wirth et al., 2011; Rodriguez Moreno et al.,  
491 2014; Humphreys et al., 2015; Jackson et al., 2019), most DMN areas in the listener's  
492 brain exhibited reduced activities during speech comprehension relative to the low-  
493 level baseline, and the network dynamics of DMN were anticorrelated with the task-  
494 positive pLN. Dynamic Causal Modeling showed the pLN had inhibitory influence on  
495 the DMN, whereas the DMN had excitatory influence on the pLN. Further two-brain  
496 analyses revealed the activities of the DMN in the listener's brain were tightly coupled  
497 with the activities of homologous network in the speaker's brain. Significant listener-  
498 speaker neural coupling was also observed in the pLN, but was weaker and peaked  
499 earlier than that in the DMN. Notably, the interbrain network couplings were not driven  
500 by low-level perceptual processing, neither by general attention or memory processes:  
501 when communication failed, the interbrain coupling vanished; moreover, the coupling

502 pattern can be used to discriminate which story (out of three) was processed by the  
503 listener with a high accuracy. Finally, the strength of inter-brain neural coupling in both  
504 the DMN and pLN predicted the degree to which listeners comprehended and  
505 memorized the speech.

506 Currently, whether and how the DMN contributes to auditory language  
507 comprehension remains elusive. To explore the potential role of DMN in language  
508 processing, existing studies primarily rely on the manipulation of task stimuli or  
509 demands to induce changes in neural activities within individual brains. However, the  
510 DMN seems to be only weakly modulated by the task-related change, or even de-  
511 activated during task processing relative to low-level baselines. Several studies  
512 measured the similarity (temporal correlations) of brain activities across subjects  
513 receiving the same language inputs, and observed significant ISC and task-induced  
514 changes of ISC in the DMN (Wilson et al., 2007; Simony et al., 2016; Yeshurun et al.,  
515 2017). These findings are suggested to reflect the active role of DMN in the semantic  
516 and conceptual processing of language. However, the ISC could also arise from the  
517 shared level of task engagement across subjects. In this study, by examining participants  
518 in communication rather than in isolation, we found significant listener-speaker neural  
519 coupling in the DMN and a positive correlation of this coupling with behavioral  
520 measurements. These findings suggest the information represented in the DMN was  
521 aligned between the listener and speaker, which facilitated information transfer from  
522 the speaker to the listener. Notably, the inter-brain coupling was unlikely an  
523 epiphenomenon of task engagement, since the level of task engagement was not



524 equivalent across the speaker and listener over the course of communication. For  
525 instance, when encountering difficulties in lexical retrieval or organizing thoughts, the  
526 speaker would articulate slower than usual; however, for the listener, the slowly-  
527 presented utterances are easier to comprehend.

528 While most DMN areas exhibited reduced activities during speech listening relative  
529 to the fixation period, most pLN areas showed increased activities. Moreover, the  
530 dynamics of the two networks were anticorrelated. Taking the perspective from non-  
531 language studies, such a pattern seems to indicate the DMN's activity interferes with  
532 the ongoing speech processing and needs to be suppressed in order to support the  
533 externally-directed cognitive processes (Anticevic et al., 2012; Gauffin et al., 2013;  
534 Zhou et al., 2016). However, further two-brain analyses indicate a division of labor  
535 rather than simply an antagonistic relationship between the DMN and the pLN. Like  
536 the DMN, the activities in the pLN were coupled across the listener and speaker, and  
537 the interbrain coupling was also positively correlated with speech comprehension.  
538 Notably, the strength and temporal profile of inter-brain coupling differed between the  
539 two networks. In the pLN, listeners' coupling responses to the speaker first occurred  
540 without a temporal lag (i.e., time-locked to the speaker's vocalization) and then reached  
541 the peak at a lag of 4s; in the DMN, the coupling responses first occurred at a lag of 2s  
542 and reached the peak at a lag of 6s. Similarly delayed coupling responses in the  
543 listener's brain to the speaker's brain have been reported in previous studies applying  
544 fNIRS (Y. Liu et al., 2017), EEG (Kuhlen et al., 2012; Perez et al., 2017) and fMRI  
545 (Stephens et al., 2010; Silbert et al., 2014) techniques. The response lag is likely related

546 to the hierarchical nature of language production and comprehension. During natural  
547 communication, the speaker develops a concept or message, retrieves the lexical-  
548 syntactic forms, organizes them into sentences based on grammar principles, and finally  
549 produce utterances; the listener analyzes the sounds, maps utterances into meaning,  
550 integrates words into sentences, and builds a situation model. The high-level  
551 information takes relatively long time for the speaker to produce and for the listener to  
552 comprehend, which may result in the delay in interbrain coupling. The differences in  
553 the response lag thus suggest the DMN was dominantly involved in the processing of  
554 high-level information integrated over a larger timescale (about 2-12s), while the pLN  
555 was involved in processing lower-level information integrated over a shorter timescale  
556 (about 0-8s). We also observed the overall interbrain couplings in the DMN were  
557 stronger than in the pLN. This may because the listener and speaker obtained greater  
558 alignments on high-level representations than on low-level representations (such as  
559 auditory-motor information).

560 The proposed division of labor between the DMN and pLN is in line with an  
561 influential theory proposed by Berwick and colleagues (Berwick et al., 2013).  
562 According to this theory, the basic design for language faculty is composed of a basic  
563 language system that represents syntactic rules and lexical items, a sensory-motor  
564 system that connects mental expressions generated by the basic language system to the  
565 external world, and an internal conceptual-intentional system which connects these  
566 mental expressions to activities in the internalized mental world. Based on the results  
567 from this study and prior knowledge about the DMN under resting states, we speculate

568 the DMN likely occupies (part of) the internal conceptual-intentional system, and the  
569 pLN occupies (part of) the systems for linguistic representation and sensory-motor  
570 conversion. This internal versus external functional division would explain the opposite  
571 response profiles of the DMN and pLN to external stimulations while both networks  
572 play an important role in language comprehension. If the assumption that DMN  
573 occupies the internal conceptual-intentional system holds, it would call for a re-  
574 interpretation of the activity of DMN in several circumstances. For instance, the  
575 overactivation of DMN in older adults during task processing may unnecessarily reflect  
576 a failure to suppress task-unrelated thoughts, but may reflect a shift from a cognitive  
577 style dominated by externally-directed processing to a style with more engagement of  
578 internally-directed processing.

579 To conclude, this study revealed that, despite being deactivated and anticorrelated  
580 with the task-positive pLN, the DMN plays an active role in narrative speech  
581 comprehension, as demonstrated by the tight listener-speaker neural coupling in this  
582 network and the positive correlation of network coupling with speech comprehension.  
583 We infer the DMN may occupy an internal conceptual system that works cooperatively  
584 with the externally-oriented pLN to subserve language comprehension. These findings  
585 shed new light on the functional property of DMN during task processing and extend  
586 our understanding about how language is processed in the brain. This study also  
587 highlights the importance of taking the two-brain approach to gain a more complete  
588 picture of the brain.

589

590 **Acknowledgments:** This work was supported by grants from the National Natural  
591 Science Foundation of China (NSFC:31900802, 31971036), China Postdoctoral  
592 Science Foundation (2019M653248) and the Open Research Fund of the State Key  
593 Laboratory of Cognitive Neuroscience and Learning (CNLYB1803). No conflict of  
594 interest is declared.

#### 595 **Credit Author Statement**

596 Guosheng Ding & Hong Chen: Conceptualization, Writing-Review & Editing,  
597 Supervision; Lanfang Liu: Conceptualization, Formal analysis, Writing-Original Draft,  
598 Project administration; Zhiting Ren: Project administration, Writing-Review & Editing;  
599 Hehui Li, Yuxuan Zhang, Jiang Qiu & Chunming Lu: Conceptualization, Writing -  
600 Review & Editing.

#### 601 **5. Reference**

602 Anticevic, A., Cole, M. W., Murray, J. D., Corlett, P. R., Wang, X.-J., & Krystal, J. H.  
603 (2012). The role of default network deactivation in cognition and disease. *Trends*  
604 *in Cognitive Sciences*, *16*(12), 584-592.  
605 doi:<https://doi.org/10.1016/j.tics.2012.10.008>  
606 Beckmann, C. F., Mackay, C. E., Filippini, N., & Smith, S. M. (2009). Group  
607 comparison of resting-state fMRI data using multi-subject ICA and dual regression.  
608 *NeuroImage*, *47*(Suppl 1), S148.  
609 Behzadi, Y., Restom, K., Liau, J., & Liu, T. T. (2007). A component based noise  
610 correction method (CompCor) for BOLD and perfusion based fMRI. *NeuroImage*,

- 611 37(1), 90-101. doi:<https://doi.org/10.1016/j.neuroimage.2007.04.042>
- 612 Benjamini, Y., & Hochberg, Y. (1995). Controlling the False Discovery Rate: A  
613 Practical and Powerful Approach to Multiple Testing. *Journal of the Royal*  
614 *Statistical Society: Series B (Methodological)*, 57(1), 289-300. doi:10.1111/j.2517-  
615 6161.1995.tb02031.x
- 616 Berwick, R. C., Friederici, A. D., Chomsky, N., & Bolhuis, J. J. (2013). Evolution, brain,  
617 and the nature of language. *Trends in Cognitive Sciences*, 17(2), 89-98.  
618 doi:<https://doi.org/10.1016/j.tics.2012.12.002>
- 619 Cuevas, P., Steines, M., He, Y., Nagels, A., Culham, J., & Straube, B. (2019). The  
620 facilitative effect of gestures on the neural processing of semantic complexity in a  
621 continuous narrative. *NeuroImage*, 195, 38-47.  
622 doi:<https://doi.org/10.1016/j.neuroimage.2019.03.054>
- 623 Dice, L. R. (1945). Measures of the Amount of Ecologic Association Between Species.  
624 *Ecology*, 26(3), 297-302. doi:10.2307/1932409
- 625 Fox, M. D., Snyder, A. Z., Vincent, J. L., Corbetta, M., Van Essen, D. C., & Raichle, M.  
626 E. (2005). The human brain is intrinsically organized into dynamic, anticorrelated  
627 functional networks. *Proceedings of the National Academy of Sciences of the*  
628 *United States of America*, 102(27), 9673-9678. doi:10.1073/pnas.0504136102
- 629 Friston, K. J. (2011). Functional and Effective Connectivity: A Review. *Brain*  
630 *Connectivity*, 1(1), 13-36. doi:10.1089/brain.2011.0008
- 631 Friston, K. J., Kahan, J., Biswal, B., & Razi, A. (2014). A DCM for resting state fMRI.  
632 *NeuroImage*, 94, 396-407. doi:<https://doi.org/10.1016/j.neuroimage.2013.12.009>

- 633 Friston, K. J., Williams, S., Howard, R., Frackowiak, R. S. J., & Turner, R. (1996).  
634 Movement-Related effects in fMRI time-series. *Magnetic Resonance in Medicine*,  
635 35(3), 346-355. doi:10.1002/mrm.1910350312
- 636 Gauffin, H., van Ettinger-Veenstra, H., Landtblom, A.-M., Ulrici, D., McAllister, A.,  
637 Karlsson, T., & Engström, M. (2013). Impaired language function in generalized  
638 epilepsy: Inadequate suppression of the default mode network. *Epilepsy &*  
639 *Behavior*, 28(1), 26-35. doi:<https://doi.org/10.1016/j.yebeh.2013.04.001>
- 640 Greicius, M. D., & Menon, V. (2004). Default-Mode Activity during a Passive Sensory  
641 Task: Uncoupled from Deactivation but Impacting Activation. *Journal of Cognitive*  
642 *Neuroscience*, 16(9), 1484-1492. doi:10.1162/0898929042568532
- 643 Hasson, U., & Frith, C. D. (2016). Mirroring and beyond: coupled dynamics as a  
644 generalized framework for modelling social interactions. *Philosophical*  
645 *Transactions of the Royal Society of London. Series B: Biological Sciences*,  
646 371(1693). doi:10.1098/rstb.2015.0366
- 647 Hasson, U., Ghazanfar, A. A., Galantucci, B., Garrod, S., & Keysers, C. (2012). Brain-  
648 to-brain coupling: a mechanism for creating and sharing a social world. *Trends in*  
649 *Cognitive Science*, 16(2), 114-121. doi:10.1016/j.tics.2011.12.007
- 650 Horowitz-Kraus, T., Farah, R., Hajinazarian, A., Eaton, K., Rajagopal, A., Schmithorst,  
651 V. J., . . . Holland, S. K. (2017). Maturation of Brain Regions Related to the Default  
652 Mode Network during Adolescence Facilitates Narrative Comprehension. *Journal*  
653 *of child and adolescent behavior*, 5(1), 328. doi:10.4172/2375-4494.1000328
- 654 Humphreys, G. F., Hoffman, P., Visser, M., Binney, R. J., & Lambon Ralph, M. A.

- 655 (2015). Establishing task- and modality-dependent dissociations between the  
656 semantic and default mode networks. *Proceedings of the National Academy of*  
657 *Sciences*, *112*(25), 7857. doi:10.1073/pnas.1422760112
- 658 Jackson, R. L., Cloutman, L. L., & Lambon Ralph, M. A. (2019). Exploring distinct  
659 default mode and semantic networks using a systematic ICA approach. *Cortex*, *113*,  
660 279-297. doi:<https://doi.org/10.1016/j.cortex.2018.12.019>
- 661 Jiang, J., Dai, B., Peng, D., Zhu, C., Liu, L., & Lu, C. (2012). Neural synchronization  
662 during face-to-face communication. *Journal of Neuroscience*, *32*(45), 16064-  
663 16069. doi:10.1523/JNEUROSCI.2926-12.2012
- 664 Kasess, C. H., Stephan, K. E., Weissenbacher, A., Pezawas, L., Moser, E., &  
665 Windischberger, C. (2010). Multi-subject analyses with dynamic causal modeling.  
666 *NeuroImage*, *49*(4), 3065-3074.  
667 doi:<https://doi.org/10.1016/j.neuroimage.2009.11.037>
- 668 Kuhlen, A. K., Allefeld, C., & Haynes, J.-D. (2012). Content-specific coordination of  
669 listeners' to speakers' EEG during communication. *Frontiers in Human*  
670 *Neuroscience*, *6*, 266. doi: <https://doi.org/10.3389/fnhum.2012.00266>
- 671 Lerner, Y., Honey, C. J., Silbert, L. J., & Hasson, U. (2011). Topographic mapping of a  
672 hierarchy of temporal receptive windows using a narrated story. *31*(8), 2906-2915.
- 673 Li, W., Mai, X., & Liu, C. (2014). The default mode network and social understanding  
674 of others: what do brain connectivity studies tell us. *8*(74).  
675 doi:10.3389/fnhum.2014.00074
- 676 Liu, L., Zhang, Y., Zhou, Q., Garrett, D. D., Lu, C., Chen, A., . . . Ding, G. (2020).

- 677 Auditory–Articulatory Neural Alignment between Listener and Speaker during  
678 Verbal Communication. *Cerebral Cortex*, 30(3), 942-951.  
679 doi:<https://doi.org/10.1093/cercor/bhz138>
- 680 Liu, Y., Piazza, E. A., Simony, E., Shewokis, P. A., Onaral, B., Hasson, U., & Ayaz, H.  
681 (2017). Measuring speaker-listener neural coupling with functional near infrared  
682 spectroscopy. *Scientific Reports*, 7, 43293. doi:10.1038/srep43293
- 683 McKiernan, K. A., Kaufman, J. N., Kucera-Thompson, J., & Binder, J. R. (2003). A  
684 Parametric Manipulation of Factors Affecting Task-induced Deactivation in  
685 Functional Neuroimaging. *Journal of Cognitive Neuroscience*, 15(3), 394-408.  
686 doi:10.1162/089892903321593117
- 687 Menenti, L., Garrod, S., & Pickering, M. (2012). Toward a neural basis of interactive  
688 alignment in conversation. *Frontiers in Human Neuroscience*, 6(185).  
689 doi:10.3389/fnhum.2012.00185
- 690 Murta, T., Leal, A., Garrido, M. I., & Figueiredo, P. (2012). Dynamic Causal Modelling  
691 of epileptic seizure propagation pathways: A combined EEG–fMRI study.  
692 *NeuroImage*, 62(3), 1634-1642.  
693 doi:<https://doi.org/10.1016/j.neuroimage.2012.05.053>
- 694 Neumann, J., & Lohmann, G. (2003). Bayesian second-level analysis of functional  
695 magnetic resonance images. *NeuroImage*, 20(2), 1346-1355.  
696 doi:[https://doi.org/10.1016/S1053-8119\(03\)00443-9](https://doi.org/10.1016/S1053-8119(03)00443-9)
- 697 Perez, A., Carreiras, M., & Dunabeitia, J. A. (2017). Brain-to-brain entrainment: EEG  
698 interbrain synchronization while speaking and listening. *Scientific Reports*, 7(1),



- 699 4190. doi:10.1038/s41598-017-04464-4
- 700 Pickering, M. J., & Garrod, S. (2006). Alignment as the basis for successful  
701 communication. *Research on Language & Computation*, 4(2), 203-228.  
702 doi:<https://doi.org/10.1007/s11168-006-9004-0>
- 703 Raichle, M. E. (2010). Two views of brain function. *Trends in Cognitive Science*, 14(4),  
704 180-190. doi:10.1016/j.tics.2010.01.008
- 705 Raichle, M. E., MacLeod, A. M., Snyder, A. Z., Powers, W. J., Gusnard, D. A., &  
706 Shulman, G. L. (2001). A default mode of brain function. *Proceedings of the*  
707 *National Academy of Sciences*, 98(2), 676-682. doi:10.1073/pnas.98.2.676
- 708 Rodriguez Moreno, D., Schiff, N. D., & Hirsch, J. (2014). Negative Blood Oxygen  
709 Level Dependent Signals During Speech Comprehension. *Brain Connectivity*, 5(4),  
710 232-244. doi:10.1089/brain.2014.0272
- 711 Schoot, L., Hagoort, P., & Segaert, K. (2016). What can we learn from a two-brain  
712 approach to verbal interaction? *Neuroscience & Biobehavioral Reviews*, 68, 454-  
713 459. doi:<http://dx.doi.org/10.1016/j.neubiorev.2016.06.009>
- 714 Shen, X., Finn, E. S., Scheinost, D., Rosenberg, M. D., Chun, M. M., Papademetris, X.,  
715 & Constable, R. T. (2017). Using connectome-based predictive modeling to predict  
716 individual behavior from brain connectivity. *Nature Protocols*, 12(3), 506-518.  
717 doi:10.1038/nprot.2016.178
- 718 Silbert, L. J., Honey, C. J., Simony, E., Poeppel, D., & Hasson, U. (2014). Coupled  
719 neural systems underlie the production and comprehension of naturalistic narrative  
720 speech. *Proceedings of the National Academy of Sciences*, 111(43), E4687-E4696.

- 721        doi:<https://doi.org/10.1073/pnas.1323812111>
- 722        Simony, E., Honey, C. J., Chen, J., Lositsky, O., Yeshurun, Y., Wiesel, A., & Hasson, U.
- 723        (2016). Dynamic reconfiguration of the default mode network during narrative
- 724        comprehension. *Nature communications*, 7(1), 12141. doi:10.1038/ncomms12141
- 725        Smith, S. M., Miller, K. L., Moeller, S., Xu, J., Auerbach, E. J., Woolrich, M. W., . . .
- 726        Ugurbil, K. (2012). Temporally-independent functional modes of spontaneous
- 727        brain activity. *Proceedings of the National Academy of Sciences*, 109(8), 3131-
- 728        3136. doi:10.1073/pnas.1121329109
- 729        Spreng, R. N., & Grady, C. L. (2009). Patterns of Brain Activity Supporting
- 730        Autobiographical Memory, Prospection, and Theory of Mind, and Their
- 731        Relationship to the Default Mode Network. *Journal of Cognitive Neuroscience*,
- 732        22(6), 1112-1123. doi:10.1162/jocn.2009.21282
- 733        Spreng, R. N., Mar, R. A., & Kim, A. S. N. (2008). The Common Neural Basis of
- 734        Autobiographical Memory, Prospection, Navigation, Theory of Mind, and the
- 735        Default Mode: A Quantitative Meta-analysis. *Journal of Cognitive Neuroscience*,
- 736        21(3), 489-510. doi:10.1162/jocn.2008.21029
- 737        Stephens, G. J., Silbert, L. J., & Hasson, U. (2010). Speaker–listener neural coupling
- 738        underlies successful communication. *Proceedings of the National Academy of*
- 739        *Sciences*, 107(32), 14425-14430. doi:<https://doi.org/10.1073/pnas.1323812111>
- 740        Stolk, A., Verhagen, L., & Toni, I. (2016a). Conceptual Alignment: How Brains Achieve
- 741        Mutual Understanding. *Trends Cogn Sci*, 20(3), 180-191.
- 742        doi:10.1016/j.tics.2015.11.007

- 743 Stolk, A., Verhagen, L., & Toni, I. (2016b). Conceptual Alignment: How Brains  
744 Achieve Mutual Understanding. *Trends in Cognitive Science*, 20(3), 180-191.  
745 doi:10.1016/j.tics.2015.11.007
- 746 Szaflarski, J. P., Altaye, M., Rajagopal, A., Eaton, K., Meng, X., Plante, E., & Holland,  
747 S. K. (2012). A 10-year longitudinal fMRI study of narrative comprehension in  
748 children and adolescents. *NeuroImage*, 63(3), 1188-1195.  
749 doi:<https://doi.org/10.1016/j.neuroimage.2012.08.049>
- 750 Uddin, L. Q., Clare Kelly, A. M., Biswal, B. B., Xavier Castellanos, F., & Milham, M.  
751 P. (2009). Functional connectivity of default mode network components:  
752 Correlation, anticorrelation, and causality. *Human Brain Mapping*, 30(2), 625-637.  
753 doi:10.1002/hbm.20531
- 754 Wechsler, D. (1987). *WMS-R: Wechsler memory scale-revised*: Psychological  
755 Corporation.
- 756 Wheatley, T., Boncz, A., Toni, I., & Stolk, A. (2019). Beyond the Isolated Brain: The  
757 Promise and Challenge of Interacting Minds. *Neuron*, 103(2), 186-188.  
758 doi:10.1016/j.neuron.2019.05.009
- 759 Wilson, S. M., Molnar-Szakacs, I., & Iacoboni, M. (2007). Beyond Superior Temporal  
760 Cortex: Intersubject Correlations in Narrative Speech Comprehension. *Cerebral  
761 Cortex*, 18(1), 230-242. doi:10.1093/cercor/bhm049
- 762 Wirth, M., Jann, K., Dierks, T., Federspiel, A., Wiest, R., & Horn, H. (2011). Semantic  
763 memory involvement in the default mode network: a functional neuroimaging  
764 study using independent component analysis. *NeuroImage*, 54(4), 3057-3066.

765        doi:<https://doi.org/10.1016/j.neuroimage.2010.10.039>

766        Yeshurun, Y., Swanson, S., Simony, E., Chen, J., Lazaridi, C., Honey, C. J., & Hasson,  
767        U. (2017). Same Story, Different Story: The Neural Representation of Interpretive  
768        Frameworks. *28*(3), 307-319. doi:10.1177/0956797616682029

769        Zhou, L., Pu, W., Wang, J., Liu, H., Wu, G., Liu, C., . . . Liu, Z. (2016). Inefficient DMN  
770        Suppression in Schizophrenia Patients with Impaired Cognitive Function but not  
771        Patients with Preserved Cognitive Function. *Scientific Reports*, *6*(1), 21657.  
772        doi:10.1038/srep21657

773        Zwaan, R. A., & Radvansky, G. A. (1998). Situation models in language comprehension  
774        and memory. *Psychological Bulletin*, *123*(2), 162-185. doi:10.1037/0033-  
775        2909.123.2.162

776

777

778

779

780

781 **6. Figures and captions**

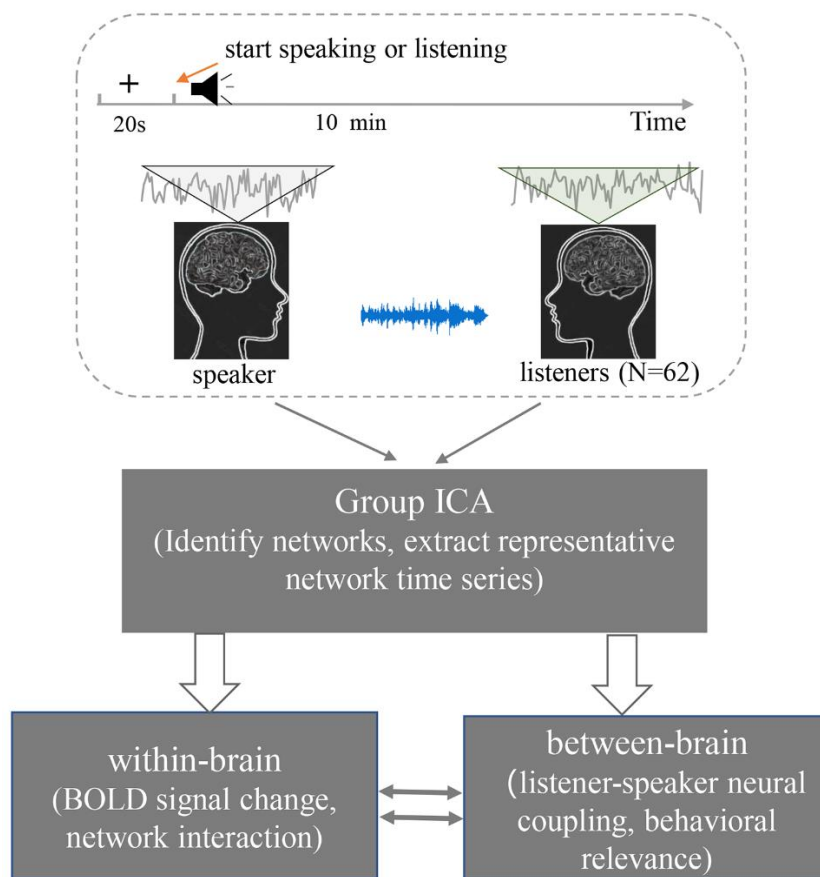

782

783 Figure 1. Shema for the experimental design and data analyses. We recorded a speaker

784 telling real-life stories during fMRI scanning, and then played the recording to a group

785 of listeners during scanning. A group ICA was conducted on the pooled data to detect

786 the default mode network (DMN) and perisylvian language network (pLN). We first

787 examined BOLD signal changes and network interactions within single brains. Next,

788 we examined neural couplings between the speaker and each listener. Finally, we

789 explored whether the between-brain coupling was affected by (or had an effect on) the

790 task-induced (de)activation and network interactions within the listeners' brains.

791

792

793

794

795

**(a) ICA component**

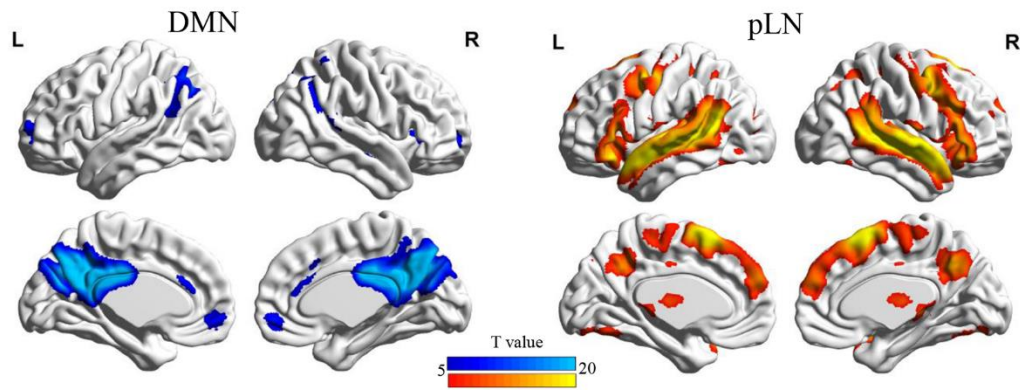

**(b) BOLD signal change**

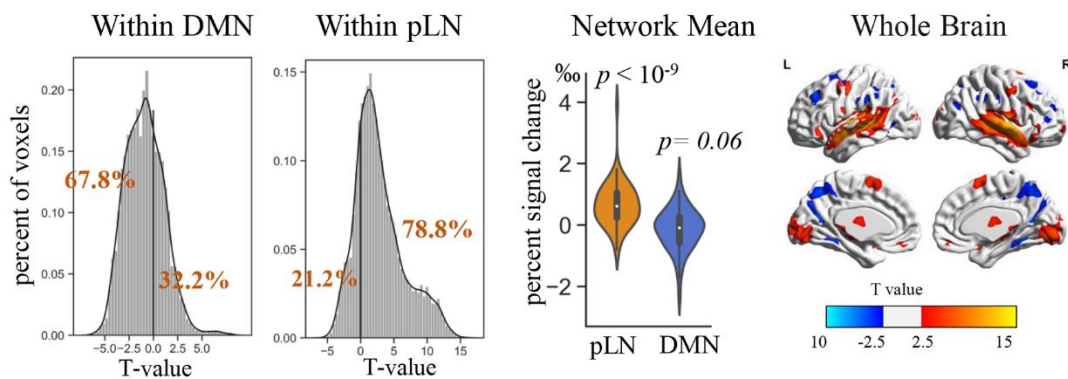

796

797 Figure 2. The default mode network (DMN) and the perisylvian language network (pLN)

798 and their activation patterns. (a). The spatial distribution of the DMN and the pLN

799 identified by the group ICA. Presented are the *t*-statistic maps thresholded at  $p < 0.05$

800 using FWE correction. (b). Task-induced activations in the pLN and deactivations in

801 the DMN, assessed by percent signal changes from the baseline (a fixation period) to

802 the speech listening task. The histogram presents the distribution of *t*-values across all

803 voxels within the network. The violin plot shows the distribution of percent signal

804 change averaged over voxels within the network. The whole-brain analysis shows that

805 significantly activated and deactivated voxels mainly fall into the pLN areas and DMN

806 areas, respectively.

807

808

809

810

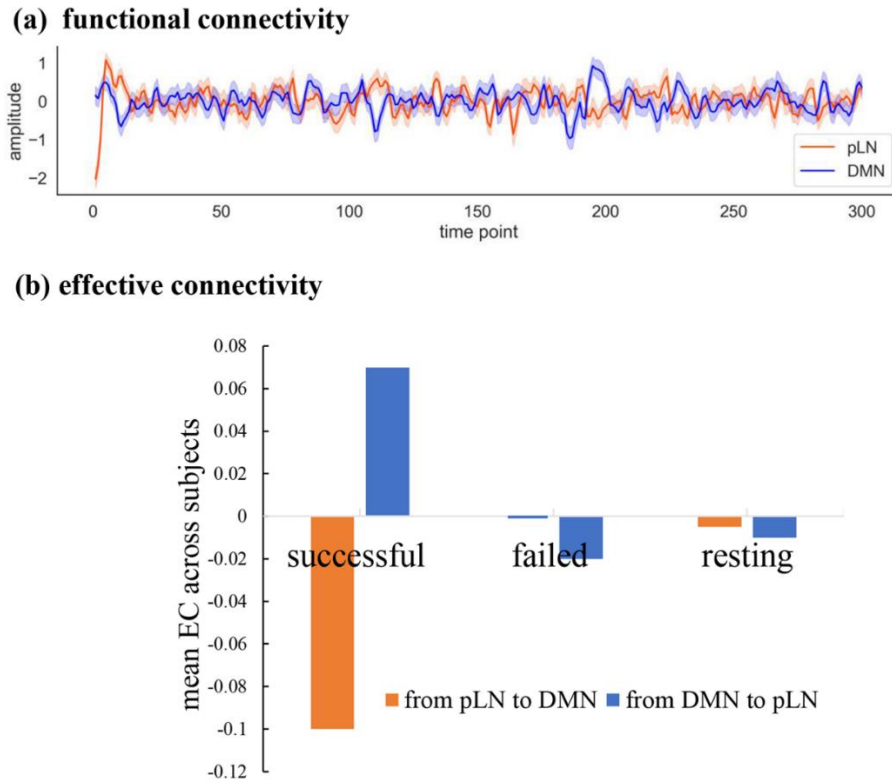

811

812 Figure 3. Within-brain functional and effective connectivity between the DMN and  
813 pLN. (a) Anticorrelation between the dynamics of DMN and pLN. The plot shows the  
814 mean and 95% confidence interval (*shaded area*) of network time series across 62  
815 participants. (b) Effective connectivity between the two networks revealed by Dynamic  
816 Causal Modeling. During successful speech comprehension, there was a negative  
817 (indicating inhibitory) connection from the pLN to the DMN, but a positive (indicating  
818 excitatory) connection from the DMN to the pLN. This excitatory effect was absent  
819 when comprehension failed or when participants were at rest.

820

821

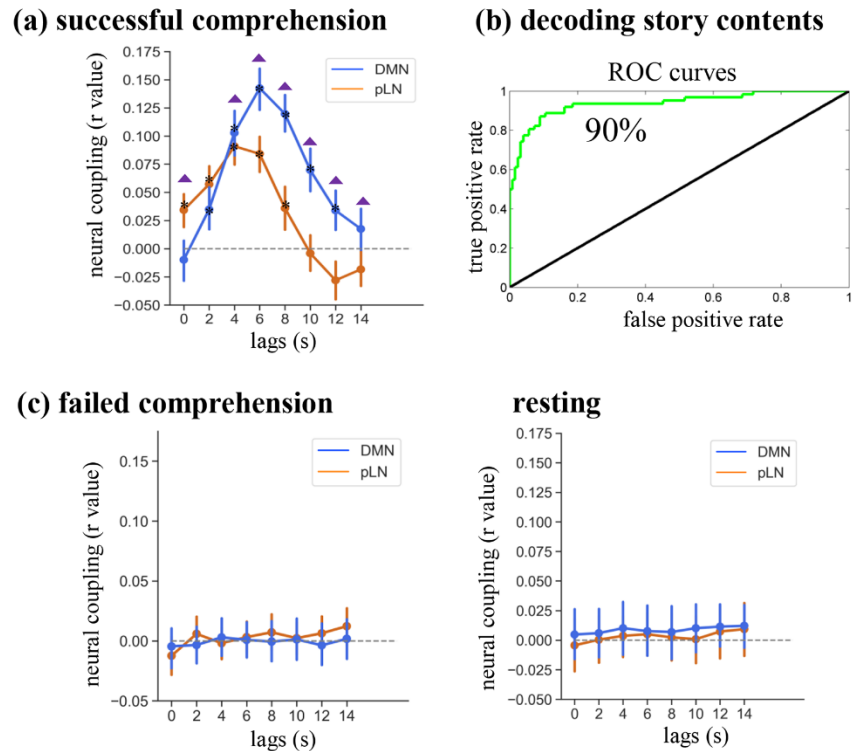

822

823 Figure 4. Neural couplings between the listener and speaker as a function of temporal  
824 lags. (a) During successful communication, the listener's network activity was coupled  
825 with the speaker's network activity with several delays. Note, the coupling in DMN  
826 was stronger than that in the pLN (except for the zero-lag activity). (b) The coupling  
827 pattern of the two networks can be used to decode which story (out of three) was played  
828 to the listener. (c) When listeners could not understand the speaker or were at a resting  
829 state, the interbrain coupling vanished. Plotted are the mean and 95% confidence  
830 interval of the neural couplings. The asterisk denotes significant differences from zero  
831 (by one-sample *t*-tests); the triangle denotes significant differences between the DMN  
832 and pLN (by paired *t*-tests).

833

834

835

836

837

838

839

840

841



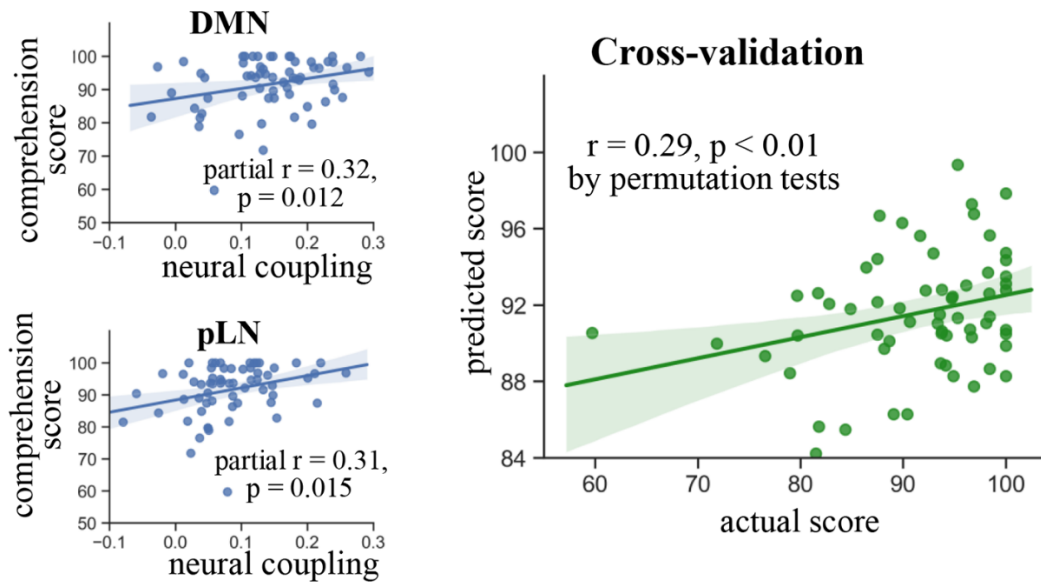

842

843 Figure 5. The strength of listener-speaker neural coupling predicts speech  
844 comprehension. Left: Correlations between speech understanding and listener-speaker  
845 neural couplings in the DMN and pLN, with memory capacity controlled. Right: Cross-  
846 validation for the brain-behavior relationship using a level-one-out procedure. In each  
847 fold of cross-validation, a regression model was built based on the data from all  
848 participants ( $N = 62$ ) but one. The model was then used to predict the comprehension  
849 scores for the left-out participant based on his/her neural couplings with the speaker in  
850 the DMN and pLN.

851

852

853

854

855

856

857

858

859

860

861

862

863

864

865

866

867

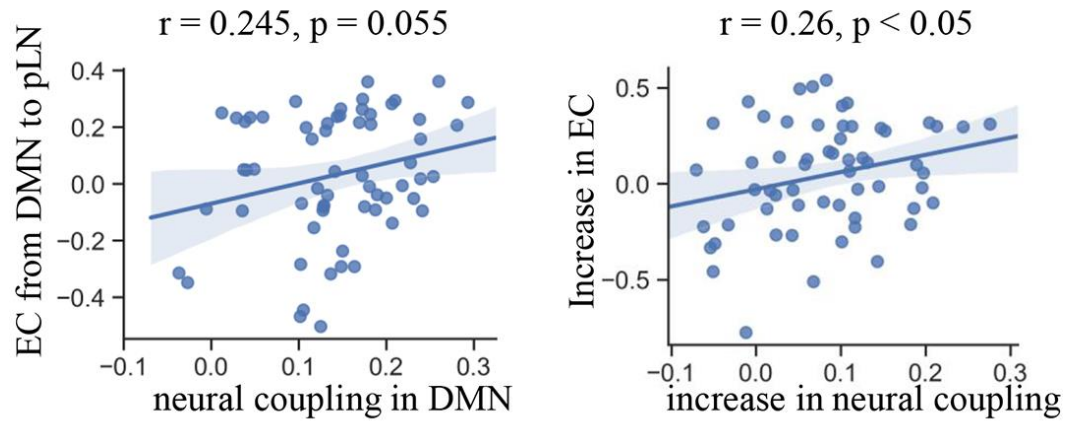

868

869 Figure 6. Within-brain effective connection covaries with between-brain neural  
870 coupling. Listeners more tightly coupled with the speaker in the DMN tended to exhibit  
871 more positive DMN  $\rightarrow$  pLN effective connections. Besides, the increase in DMN  
872 coupling during successful relative to failed speech comprehension was positively  
873 correlated with the increase in DMN  $\rightarrow$  pLN connection.
